# Supplementary material
Source: publisher figshare collection journal article supplement (https://sage.figshare.com/ndownloader/files/22010943)
Supplement: Supplementary file 1 [file 22010943]

Reviewer 2 v.1

Comments to the Author

Main Text. What specific metals have been associated with idiopathic pulmonary fibrosis? Heavy metals? Consider naming specific elements.

Section on Gastrointestinal disease. Specify what is meant by anti-acid therapy. Do you mean proton pump inhibitors or H2 antagonists?
